# Supplementary material
Source: publisher site journal article supplement (https://www.dovepress.com/article/583971)
Supplement: Supplementary file 1 [file 583971%20Revised%20Supplemental%20Tables%201-4.docx]

Supplemental Table 1 *Characteristics of 23 Dropout Patients Compared with 260 Patients with Outcomes*

|  | Dropouts  (n = 23) | Completers  (n = 260) | P value |
| --- | --- | --- | --- |
| Baseline Characteristics | | | |
| Age, yrs. | 67.1 ± 4.8 | 66.8 ± 5.3 | 0.816 |
| Male | 16(69.6) | 188(72.3) | 0.779 |
| BMI, kg/m2 | 25.1 ± 2.7 | 25.6 ± 3.1 | 0.461 |
| Education level |  | | |
| Illiteracy | 1(4.3) | 25(9.6) | 0.502 |
| Preliminary school | 5(21.7) | 81(31.2) |
| Middle school | 8(34.8) | 83(31.9) |
| High school and above | 9(39.1) | 71(27.3) |
| Marital status |  | | |
| Married | 20(87.0) | 235(90.4) | 0.485 |
| Death of a spouse | 3(13.0) | 25(9.6) |
| Smoking | 9(39.1) | 85(32.7) | 0.530 |
| Alcoholism | 4(17.4) | 33(12.7) | 0.519 |
| History of surgery | 4(17.4) | 63(24.2) | 0.611 |
| EuroSCORE I | 6 [5-7] | 5 [5-6] | 0.089 |
| Medical history |  | | |
| Hypertension | 16(69.6) | 175(67.3) | 0.825 |
| Diabetes | 8(34.8) | 95(36.5) | 0.867 |
| After PCI surgery | 3(13.0) | 35(13.5) | 0.955 |
| Heart failure | 4(17.4) | 13(5.0) | 0.039 |
| Old myocardial infarction | 3(13.0) | 24(9.2) | 0.469 |
| Arrhythmia | 3(13.0) | 16(6.2) | 0.192 |
| Cerebrovascular disease | 6(26.1) | 51(19.6) | 0.458 |
| Hypothyroidism | 0(0.0) | 5(1.9) | 1.000 |
| Type of medications taken | 3 [3-5] | 3 [3-5] | 0.990 |
| Preoperative chronic pain |  | | |
| Cardiac chronic pain | 12(52.2) | 128(49.2) | 0.787 |
| Non-cardiac chronic pain | 2(8.7) | 24(9.2) | 1.000 |
| PCS score | 6 [3-17] | 10 [4-17] | 0.363 |
| Anxiety a | 7(30.4) | 69(26.5) | 0.686 |
| Depression b | 7(30.4) | 54(20.8) | 0.280 |
| MMSE score | 26[24-28] | 25[22-27] | 0.162 |
| PSQI score | 3 [3-6] | 5 [3-8] | 0.132 |
| Intraoperative Characteristics | | | |
| Number of vascular grafts | 3 [3-4] | 3 [3-4] | 0.247 |
| Operation time, min | 351 ± 166 | 258 ± 46 | <0.001 |
| Anesthesia time, min | 420 ± 172 | 317 ± 50 | <0.001 |
| Hypotension c | 13(65.0) | 79(30.4) | 0.001 |
| Hypothermia d | 14(70.0) | 28(10.8) | <0.001 |
| Sufentanil consumption, mg | 295[204-464] | 310[206-458] | 0.804 |
| Blood loss, ml | 500[500-750] | 300[300-475] | <0.001 |
| Plasma transfusion, ml | 425[275-638] | 400[250-400] | 0.010 |
| Red cell transfusion, U | 2 [0-4] | 0 [0-0] | <0.001 |
| Autotransfusion, ml | 413[125-719] | 255[200-469] | 0.312 |

Note: Data are number (%), mean ± SD, or median [interquartile range]. A *P* value < 0.05 was considered to indicate statistical significance.

a the Hospital Anxiety and Depression Scale-Anxiety score > 7;

b the Hospital Anxiety and Depression Scale-Depression score > 7;

c intraoperative systolic blood pressure <70 mmHg lasting for more than 15 minutes;

d intraoperative body temperature <35.5 °C lasting for more than 15 minutes.

Abbreviations: TaVNS, Transcutaneous Auricular Vagus Nerve Stimulation; PIFB, Pectoral-intercostal Fascial Block; BMI, Body Mass Index; EuroSCORE I, European System for Cardiac Operative Risk Evaluation I; PCI, Percutaneous Coronary Intervention; PCS, Pain Catastrophizing Scale; MMSE, Mini-Mental State Examination; PSQI, the Pittsburgh Sleep Quality Index.

Supplemental Table 2 *Baseline and Intraoperative Characteristics of 283 Surgical Patients Randomized to TaVNS or Sham taVNS and Ropivacaine PIFB or Placebo PIFB*

|  | taVNS  (n = 142) | Sham taVNS  (n = 141) | P  Value | R-PIFB  (n = 141) | P-PIFB  (n =142) | P  Value |
| --- | --- | --- | --- | --- | --- | --- |
| Baseline characteristics | | | | | | |
| Age, yrs. | 67.1 ± 5.2 | 66.6 ± 5.2 | 0.386 | 67.0 ± 5.2 | 66.7 ± 5.2 | 0.568 |
| Male | 102(71.8) | 102(72.3) | 0.924 | 101(71.6) | 103(72.5) | 0.865 |
| BMI, kg/m2 | 25.7 ± 3.2 | 25.4 ± 3.0 | 0.412 | 25.6 ± 3.1 | 25.5 ± 3.1 | 0.815 |
| Education level |  | | | | | |
| Illiteracy | 12(8.5) | 14(9.9) | 0.969 | 13(9.2) | 13(9.2) | 0.996 |
| Preliminary school | 43(30.3) | 43(30.5) | 43(30.5) | 43(30.3) |
| Middle school | 47(33.1) | 44(31.2) | 46(32.6) | 45(31.7) |
| High school and above | 40(28.2) | 40(28.4) | 39(27.7) | 41(28.9) |
| Marital status |  | | | | | |
| Married | 127(89.4) | 128(90.8) | 0.705 | 125(88.7) | 130(91.5) | 0.414 |
| Death of a spouse | 15(10.6) | 13(9.2) | 16(11.3) | 12(8.5) |
| Smoking | 48(33.8) | 46(32.6) | 0.833 | 43(30.5) | 51(35.9) | 0.333 |
| Alcoholism | 21(14.8) | 16(11.3) | 0.391 | 15(10.6) | 22(15.5) | 0.226 |
| Surgical history | 38(26.8) | 29(20.6) | 0.220 | 36(25.5) | 31(21.8) | 0.464 |
| EuroSCORE I | 6 [5-7] | 5 [4-6] | 0.107 | 6 [5-7] | 5 [5-6] | 0.389 |
| Medical history |  | | | | | |
| Hypertension | 94(66.2) | 97(68.8) | 0.641 | 97(68.8) | 94(66.2) | 0.641 |
| Diabetes | 55(38.7) | 48(34.0) | 0.412 | 55(39.0) | 48(33.8) | 0.363 |
| After PCI surgery | 20(14.1) | 18(12.8) | 0.745 | 21(14.9) | 17(12.0) | 0.471 |
| Heart failure | 9(6.3) | 8(5.7) | 0.814 | 8(5.7) | 9(6.3) | 0.814 |
| Old myocardial infarction | 14(9.9) | 13(9.2) | 0.855 | 11(7.8) | 16(11.3) | 0.321 |
| Arrhythmia | 9(6.3) | 10(7.1) | 0.800 | 11(7.8) | 8(5.6) | 0.466 |
| Cerebrovascular disease | 29(20.4) | 28(19.9) | 0.906 | 32(22.7) | 25(17.6) | 0.286 |
| Hypothyroidism | 3(2.1) | 2(1.4) | 0.658 | 3(2.1) | 2(1.4) | 0.646 |
| Type of medications taken | 4 [3-5] | 3 [2-5] | 0.465 | 3 [2-5] | 4 [3-5] | 0.334 |
| Preoperative chronic pain |  | | | | | |
| Cardiac chronic pain | 65(45.8) | 75(53.2) | 0.212 | 67(47.5) | 73(51.4) | 0.513 |
| Non-cardiac chronic pain | 16(11.3) | 10(7.1) | 0.224 | 14(9.9) | 12(8.5) | 0.667 |
| PCS score | 10 [5-19] | 9 [4-15] | 0.406 | 8 [4-15] | 12 [5-18] | 0.088 |
| Anxiety a | 39(27.5) | 37(26.2) | 0.816 | 36(25.5) | 40(28.2) | 0.617 |
| Depression b | 33(23.2) | 28(19.9) | 0.489 | 29(20.6) | 32(22.5) | 0.687 |
| MMSE score | 25 [22-27] | 26 [23-28] | 0.105 | 25 [22-27] | 26 [22-28] | 0.525 |
| PSQI score | 5 [3-8] | 5 [3-8] | 0.827 | 5 [3-8] | 5 [3-8] | 0.591 |
| Intraoperative characteristics | | | | | | |
| Number of vascular grafts | 3[3-4] | 3[3-4] | 0.568 | 3[3-4] | 3[3-4] | 0.577 |
| Operation time, min | 262 ± 64 | 266 ± 70 | 0.601 | 266 ± 76 | 262 ± 56 | 0.622 |
| Anesthesia time, min | 322 ± 70 | 326 ± 73 | 0.592 | 328 ± 79 | 320 ± 61 | 0.382 |
| Hypotension c | 47(33.6) | 45(32.1) | 0.799 | 42(30.4) | 50(35.2) | 0.395 |
| Hypothermia d | 18(12.9) | 24(17.1) | 0.315 | 18(13.0) | 24(16.9) | 0.366 |
| Sufentanil consumption, mg | 300[211-436] | 310[201-489] | 0.540 | 300[199-433] | 323[224-480] | 0.276 |
| Blood loss, ml | 300[300-500] | 300[300-500] | 0.146 | 300[300-500] | 300[300-500] | 0.957 |
| Plasma transfusion, ml | 400[200-400] | 400[250-400] | 0.790 | 400[200-400] | 400[250-400] | 0.713 |
| Red cell transfusion, U | 0[0-1] | 0[0-0] | 0.414 | 0[0-0] | 0[0-0] | 0.827 |
| Autotransfusion, ml | 300[250-500] | 250[125-375] | 0.108 | 375[125-500] | 250[200-375] | 0.145 |

Note: Data are number (%), mean ± SD, or median [interquartile range]. A *P* value < 0.05 was considered to indicate statistical significance.

a the Hospital Anxiety and Depression Scale-Anxiety score > 7;

b the Hospital Anxiety and Depression Scale-Depression score > 7;

c intraoperative systolic blood pressure <70 mmHg lasting for more than 15 minutes;

d intraoperative body temperature <35.5 °C lasting for more than 15 minutes.

Abbreviations: TaVNS, Transcutaneous Auricular Vagus Nerve Stimulation; PIFB, Pectoral-intercostal Fascial Block; BMI, Body Mass Index; EuroSCORE I, European System for Cardiac Operative Risk Evaluation I; PCI, Percutaneous Coronary Intervention; PCS, Pain Catastrophizing Scale; MMSE, Mini-Mental State Examination; PSQI, the Pittsburgh Sleep Quality Index.

Supplemental Table 3 *Univariate Logistic Regression Analysis of Perioperative Related Factors of Chronic Postsurgical Pain*

|  | B | SE | *P* | OR | 95%CI | VIF |
| --- | --- | --- | --- | --- | --- | --- |
| TaVNS | -0.550 | 0.263 | 0.037 | 0.577 | 0.344-0.967 | 1.122 |
| PIFB | -0.384 | 0.263 | 0.144 | 0.681 | 0.407-1.140 | 1.047 |
| Baseline characteristics | | | | | | |
| Age, yrs. | -0.036 | 0.025 | 0.153 | 0.964 | 0.917-1.014 | 1.131 |
| Male | 0.091 | 0.290 | 0.754 | 0.913 | 0.518-1.611 | 1.095 |
| BMI, kg/m2 | 0.037 | 0.045 | 0.417 | 1.037 | 0.949-1.134 | 1.082 |
| Education level |  | | | | |  |
| Illiteracy | Ref. | | | | |  |
| Preliminary school | -0.669 | 0.466 | 0.151 | 0.512 | 0.206-1.276 |  |
| Middle school | -0.879 | 0.469 | 0.061 | 0.415 | 0.165-1.042 |  |
| High school and above | -0.290 | 0.467 | 0.535 | 0.748 | 0.299-1.870 |  |
| Married | -0.818 | 0.518 | 0.114 | 0.441 | 0.160-1.218 |  |
| Smoking | 0.423 | 0.274 | 0.122 | 1.527 | 0.893-2.613 |  |
| Alcoholism | 0.088 | 0.388 | 0.821 | 1.092 | 0.510-2.335 |  |
| Surgical history | 0.200 | 0.300 | 0.505 | 1.221 | 0.678-2.200 |  |
| EuroSCORE I | -0.068 | 0.097 | 0.482 | 0.934 | 0.772-1.130 |  |
| Medical history |  | | | | |  |
| Hypertension | 0.189 | 0.281 | 0.501 | 1.208 | 0.696-2.097 |  |
| Diabetes | 0.442 | 0.278 | 0.112 | 1.556 | 0.902-2.684 |  |
| After PCI surgery | -0.322 | 0.399 | 0.421 | 0.725 | 0.332-1.586 |  |
| Heart failure | 0.184 | 0.616 | 0.765 | 1.202 | 0.360-4.016 |  |
| Old myocardial infarction | 0.331 | 0.436 | 0.448 | 1.393 | 0.592-3.275 |  |
| Arrhythmia | 0.490 | 0.593 | 0.408 | 1.633 | 0.511-5.218 |  |
| Cerebrovascular disease | 0.182 | 0.335 | 0.587 | 1.199 | 0.622-2.310 |  |
| Hypothyroidism | 0.235 | 0.922 | 0.799 | 1.265 | 0.208-7.713 |  |
| Type of medications taken | -0.072 | 0.086 | 0.407 | 0.931 | 0.786-1.103 |  |
| Preoperative chronic pain |  | | | | |  |
| Cardiac chronic pain | 0.388 | 0.262 | 0.139 | 1.474 | 0.882-2.464 | 1.070 |
| Non-cardiac chronic pain | 0.185 | 0.426 | 0.664 | 1.203 | 0.522-2.773 | 1.093 |
| PCS score | 0.056 | 0.016 | <0.001 | 1.095 | 1.060-1.130 | 1.376 |
| Anxiety a | 1.018 | 0.290 | <0.001 | 2.768 | 1.569-4.883 | 1.372 |
| Depression b | 0.626 | 0.311 | 0.044 | 1.870 | 1.016-3.443 | 1.261 |
| MMSE score | 0.014 | 0.033 | 0.664 | 1.014 | 0.951-1.082 |  |
| PSQI score | 0.042 | 0.031 | 0.173 | 1.043 | 0.982-1.108 |  |
| Intraoperative characteristics | | | | | |  |
| Number of vascular grafts | -0.003 | 0.173 | 0.984 | 0.997 | 0.711-1.398 |  |
| Operation time, min | 0.002 | 0.003 | 0.567 | 1.002 | 0.996-1.007 |  |
| Anesthesia time, min | 0.003 | 0.003 | 0.298 | 1.003 | 0.998-1.008 |  |
| Hypotension c | 0.523 | 0.278 | 0.060 | 1.687 | 0.977-2.910 | 1.105 |
| Hypothermia d | 0.557 | 0.404 | 0.168 | 1.745 | 0.791-3.849 |  |
| Sufentanil consumption, mg | 0.000 | 0.001 | 0.810 | 1.000 | 0.997-1.002 |  |
| Blood loss, ml | -0.001 | 0.001 | 0.503 | 0.999 | 0.998-1.001 |  |
| Plasma transfusion, ml | 0.000 | 0.001 | 0.674 | 1.000 | 0.998-1.001 |  |
| Red cell transfusion, U | 0.085 | 0.145 | 0.556 | 1.089 | 0.820-1.447 |  |
| Autotransfusion, ml | 0.000 | 0.001 | 0.913 | 1.000 | 0.999-1.001 |  |
| Secondary outcomes | | | | | |  |
| TWA pain score | 0.347 | 0.098 | <0.001 | 1.453 | 1.198-1.762 | 1.096 |
| Postoperative delirium | 0.397 | 0.269 | 0.139 | 1.488 | 0.879-2.519 |  |
| Duration of delirium e | -0.228 | 0.187 | 0.223 | 0.796 | 0.552-1.149 |  |
| Total dose (morphine eqv, mg) f | 0.002 | 0.001 | 0.220 | 1.000 | 1.000-1.003 |  |
| Rescue morphine Total dose g | 0.024 | 0.016 | 0.138 | 1.024 | 0.992-1.056 |  |
| Postoperative complications |  | | | | |  |
| Pneumonia | 0.236 | 0.265 | 0.373 | 1.267 | 0.753-2.130 |  |
| Pleural effusion | 0.557 | 0.404 | 0.168 | 1.745 | 0.791-3.849 |  |
| Pneumothorax | -0.219 | 0.703 | 0.755 | 0.803 | 0.203-3.183 |  |
| Wound infection | 0.641 | 1.420 | 0.652 | 1.899 | 0.117-30.721 |  |
| Arrhythmia | 0.125 | 0.312 | 0.689 | 1.133 | 0.615-2.088 |  |
| Aortic balloon refutation | 21.884 | NA | 0.999 | NA | NA |  |
| ICU readmission | -0.469 | 1.162 | 0.686 | 0.625 | 0.064-6.101 |  |
| Red cell transfusion, U | 0.047 | 0.058 | 0.414 | 1.048 | 0.936-1.174 |  |
| Plasma transfusion, ml | 0.000 | 0.000 | 0.128 | 1.000 | 1.000-1.001 |  |
| Albumin infusion, g | 0.007 | 0.005 | 0.155 | 1.007 | 0.997-1.017 |  |
| QoR-15 Score | -0.002 | 0.008 | 0.769 | 0.998 | 0.982-1.013 |  |
| Time to extubation, h | 0.004 | 0.005 | 0.429 | 1.004 | 0.995-1.013 |  |
| Length of ICU stay, h | 0.007 | 0.003 | 0.039 | 1.007 | 1.000-1.014 | 1.117 |
| Inflammatory Factors at POD1 h |  | | | | |  |
| IL-6, pg/ml | 0.005 | 0.001 | <0.001 | 1.005 | 1.002-1.008 | 1.128 |
| IL-1β, pg/ml | 0.209 | 0.110 | 0.056 | 1.233 | 0.994-1.528 |  |
| TNF-α, pg/ml | 0.656 | 0.297 | 0.027 | 1.926 | 1.077-3.445 |  |

Note: Data are number (%), mean ± SD, or median [interquartile range]. A *P* value < 0.05 was considered to indicate statistical significance.

a the Hospital Anxiety and Depression Scale-Anxiety score > 7;

b the Hospital Anxiety and Depression Scale-Depression score > 7;

c intraoperative systolic blood pressure <70 mmHg lasting for more than 15 minutes;

d intraoperative body temperature <35.5 °C lasting for more than 15 minutes.

e n=94;

f morphine equivalent consumption was calculated: morphine (i.v.) 10mg =dizocin (i.v.) 10 mg=pentazocine (i.v.) 30 mg=butorphanol (i.v.) 2 mg=nalbuphine (i.v.) 10 mg;

g n=102;

h n=189.

Abbreviations: VIF, Variance Inflation Factor; TaVNS, Transcutaneous Auricular Vagus Nerve Stimulation; PIFB, Pectoral-intercostal Fascial Block; BMI, Body Mass Index; EuroSCORE I, European System for Cardiac Operative Risk Evaluation I; PCI, Percutaneous Coronary Intervention; PCS, Pain Catastrophizing Scale; MMSE, Mini-Mental State Examination; PSQI, the Pittsburgh Sleep Quality Index; ICU, Intensive Care Unit; QoR-15, Quality of Recovery-15 Scale; POD, Postoperative Day.

|  | ACME | | ADE | | Total effect | | Proportion Mediated | |
| --- | --- | --- | --- | --- | --- | --- | --- | --- |
|  | Estimate (95%CI) | *P* | Estimate (95%CI) | *P* | Estimate (95%CI) | *P* | % (95%CI) | *P* |
| TWA pain score | -0.025(-0.055 - -0.003) | 0.032 | -0.106(-0.214 - -0.003) | 0.046 | -0.132(-0.240 - -0.026) | 0.015 | 19.3(0.7-78.7) | 0.046 |
| IL-6 at POD1 | -0.036(-0.083- -0.002) | 0.033 | -0.142(-0.285 - -0.004) | 0.043 | -0.178(-0.316 - -0.043) | 0.006 | 20.4(0.8-85.5) | 0.039 |

Supplemental Table 4 *Mediating Pathways for the Associations between TaVNS and CPSP*

Note: Adjusted for sex, age, body mass index, preoperative chronic pain, pain catastrophizing, anxiety, depression, intraoperative hypotension and length of Intensive Care Unitstay. A *P* value < 0.05 was considered to indicate statistical significance.

Abbreviations: TaVNS, Transcutaneous Auricular Vagus Nerve Stimulation; PIFB, Pectoral-intercostal Fascial Block; ACME, Average Causal Mediation Effect; ADE, Average Direct Effect; CI, Confidence Interval; TWA, Time-Weighted Average; POD, Postoperative Day.
